# Supplementary material for: Triglycerides to High-Density Lipoprotein Cholesterol Ratio Can Predict Impaired Glucose Tolerance in Young Women with Polycystic Ovary Syndrome
Source: PubMed Central journal article supplement — Yonsei Med J. 2016 Aug 30;57(6):1404–11. doi: 10.3349/ymj.2016.57.6.1404 (PMC5011272; doi:10.3349/ymj.2016.57.6.1404), 2016-08-30
Supplement: ymj-57-1404-s001.pdf [file ymj-57-1404-s001.pdf]

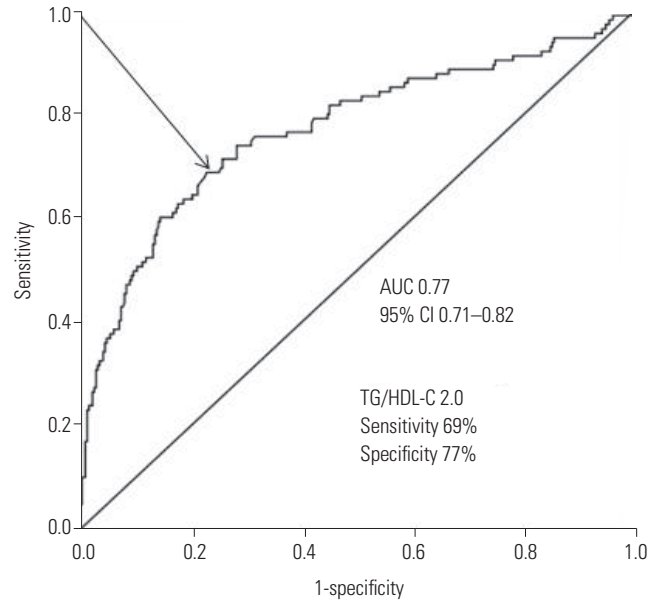

| TG/HDL-C | Sensitivity | Specificity |
|----------|-------------|-------------|
| 1.0      | 89%         | 33%         |
| 1.5      | 77%         | 62%         |
| 2.0      | 69%         | 77%         |
| 2.5      | 57%         | 86%         |
| 3.0      | 46%         | 92%         |

**Supplementary Fig. 1.** Receiver-operating characteristic curve of TG/HDL-C ratio to predict insulin resistance estimated by estimated insulin sensitivity index in women with polycystic ovary syndrome. AUC, area under the receiver-operating characteristic curve; CI, confidence interval; TG, triglycerides; HDL-C, high-density lipoprotein cholesterol.
