# Supplementary material for: Triglycerides to High-Density Lipoprotein Cholesterol Ratio Can Predict Impaired Glucose Tolerance in Young Women with Polycystic Ovary Syndrome
Source: PubMed Central journal article supplement — Yonsei Med J. 2016 Aug 30;57(6):1404–11. doi: 10.3349/ymj.2016.57.6.1404 (PMC5011272; doi:10.3349/ymj.2016.57.6.1404), 2016-08-30
Supplement: ymj-57-1404-s003.pdf [file ymj-57-1404-s003.pdf]

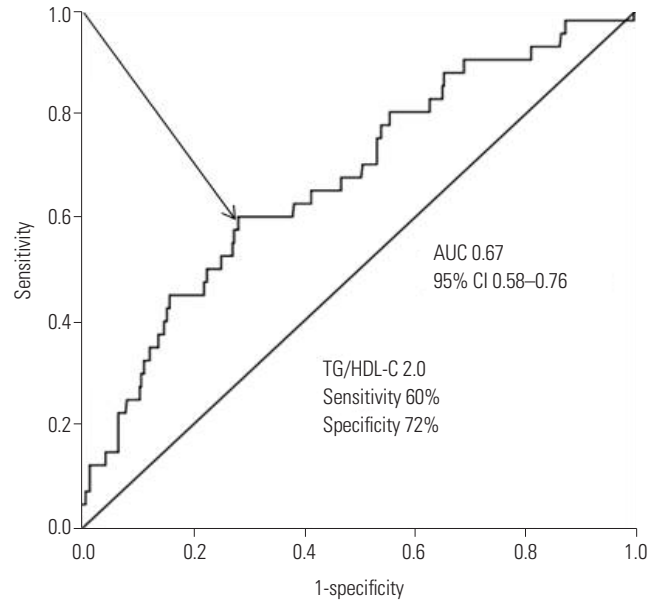

| TG/HDL-C | Sensitivity | Specificity |
|----------|-------------|-------------|
| 1.0      | 90%         | 31%         |
| 1.5      | 70%         | 50%         |
| 2.0      | 60%         | 72%         |
| 2.5      | 50%         | 77%         |
| 3.0      | 40%         | 85%         |

**Supplementary Fig. 3.** Receiver-operating characteristic curve of TG/HDL-C ratio to predict impaired glucose tolerance/diabetes mellitus in women with polycystic ovary syndrome with a normal fasting glucose level. AUC, area under the receiver-operating characteristic curve; CI, confidence interval; TG, triglycerides; HDL-C, high-density lipoprotein cholesterol.
