# Supplementary material for: Triglycerides to High-Density Lipoprotein Cholesterol Ratio Can Predict Impaired Glucose Tolerance in Young Women with Polycystic Ovary Syndrome
Source: PubMed Central journal article supplement — Yonsei Med J. 2016 Aug 30;57(6):1404–11. doi: 10.3349/ymj.2016.57.6.1404 (PMC5011272; doi:10.3349/ymj.2016.57.6.1404), 2016-08-30
Supplement: ymj-57-1404-s004.pdf [file ymj-57-1404-s004.pdf]

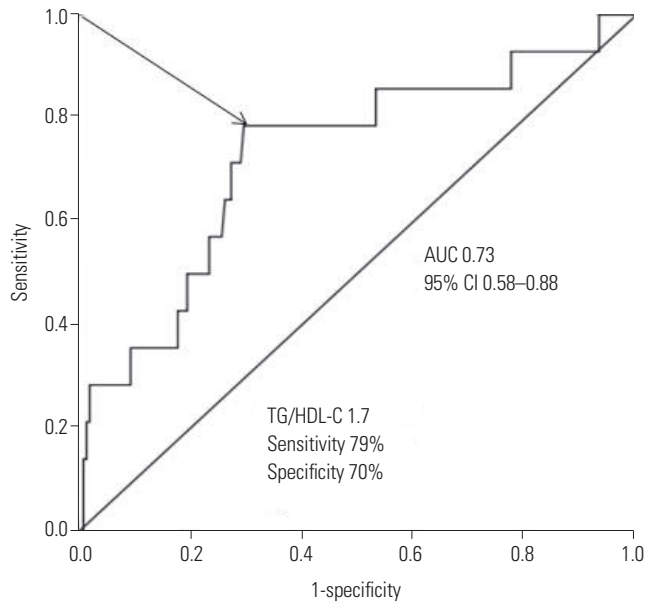

| TG/HDL-C | Sensitivity | Specificity |
|----------|-------------|-------------|
| 0.7      | 93%         | 7%          |
| 1.2      | 86%         | 39%         |
| 1.7      | 79%         | 70%         |
| 2.2      | 50%         | 79%         |
| 2.7      | 36%         | 89%         |

**Supplementary Fig. 4.** Receiver-operating characteristic curve of TG/HDL-C ratio to predict insulin resistance in healthy women with regular menstrual cycles. AUC, area under the receiver-operating characteristic curve; CI, confidence interval; TG, triglycerides; HDL-C, high-density lipoprotein cholesterol.
